# Supplementary material for: Polysaccharides of Dendrobium officinale Kimura & Migo Leaves Protect Against Ethanol-Induced Gastric Mucosal Injury via the AMPK/mTOR Signaling Pathway in Vitro and vivo
Source: PubMed Central journal article supplement (PMC7686799; doi:10.3389/fphar.2020.526349), 2020-11-11
Supplement: Image_2.pdf [file Image_2.pdf]

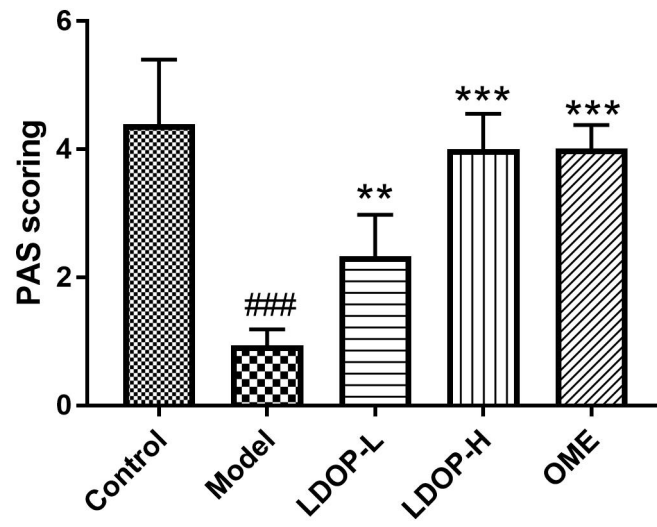

Scores from PAS. ###P<0.001 compare the control group; \*\*P < 0.01 and \*\*\*P<0.001 compare model group
